# Supplementary material
Source: PubMed Central journal article supplement (PMC2841784)
Supplement: NIHMS177829-supplement-01.pdf [file NIHMS177829-supplement-01.pdf]

# PARTITIONING OF PERFLUOROCTANOATE INTO PHOSPHATIDYLCHOLINE BILAYERS IS CHAIN LENGTH-INDEPENDENT

Wei Xie<sup>a</sup>, Geoffrey D. Bothun<sup>b</sup>, Hans-Joachim Lehmler<sup>a\*</sup>

<sup>a</sup> Department of Occupational and Environmental Health, University of Iowa, College of Public Health, Iowa City, IA 52242, USA; <sup>b</sup> Department of Chemical Engineering, University of Rhode Island, Kingston, RI, 02881, USA.

**Figure S1.** Partial phase diagrams of the DMPC-PFOA mixture obtained using TMA-DPH as fluorescence probe.

**Figure S2.** Partial phase diagrams of the DSPC-PFOA mixture obtained using TMA-DPH as fluorescence probe.

\* Corresponding Author:  
Dr. H.-J. Lehmler  
The University of Iowa  
Department of Occupational and Environmental Health  
100 Oakdale Campus #221 IREH  
Iowa City, IA 52242-5000  
Phone: (319) 335-4414  
Fax: (319) 335-4290  
e-mail: [hans-joachim-lehmler@uiowa.edu](mailto:hans-joachim-lehmler@uiowa.edu)

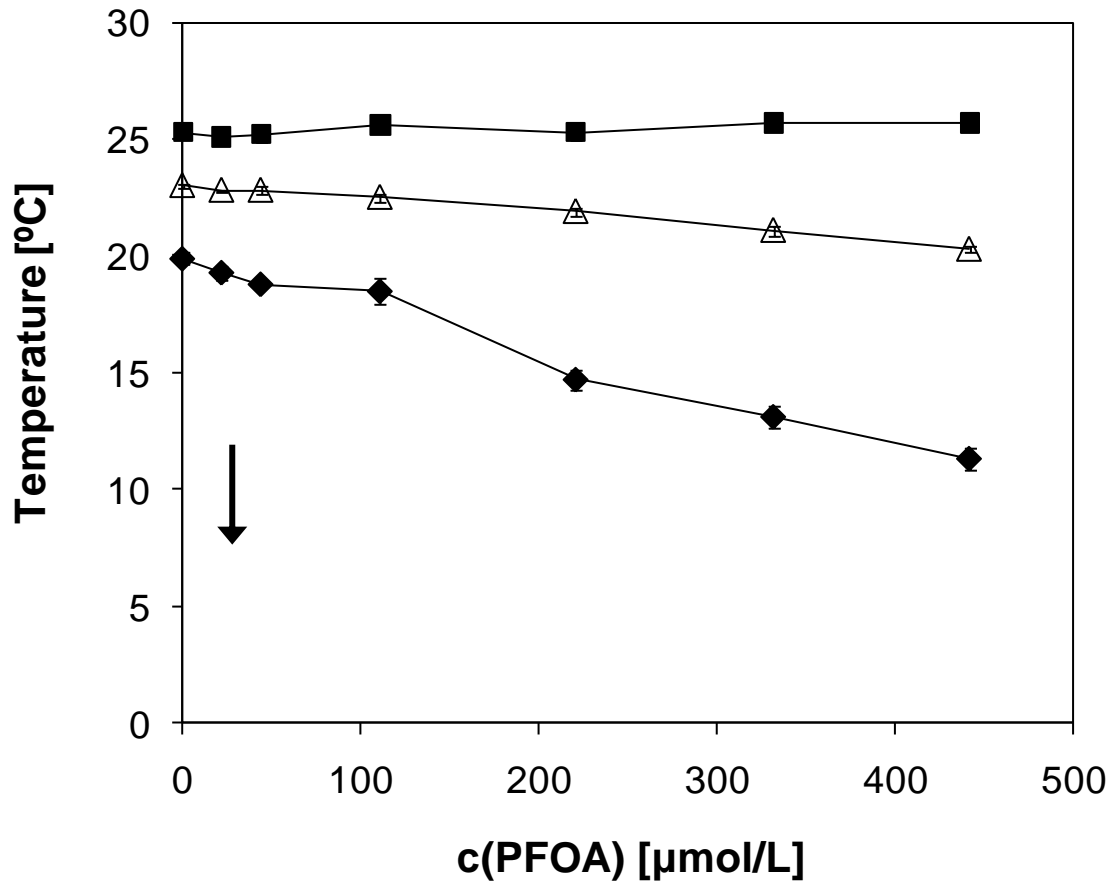

**Figure S1.** Partial phase diagrams of the DMPC-PFOA mixture obtained using TMA-DPH as fluorescence probe. As indicated by the arrow, all samples were cooled at a rate of 0.2°/minute. The data points represent averages of at least three experiments  $\pm$  one standard deviation. ■ = onset of main phase transition; ▲ = maximum of the main phase transition; ◆ = offset of the main phase transition.

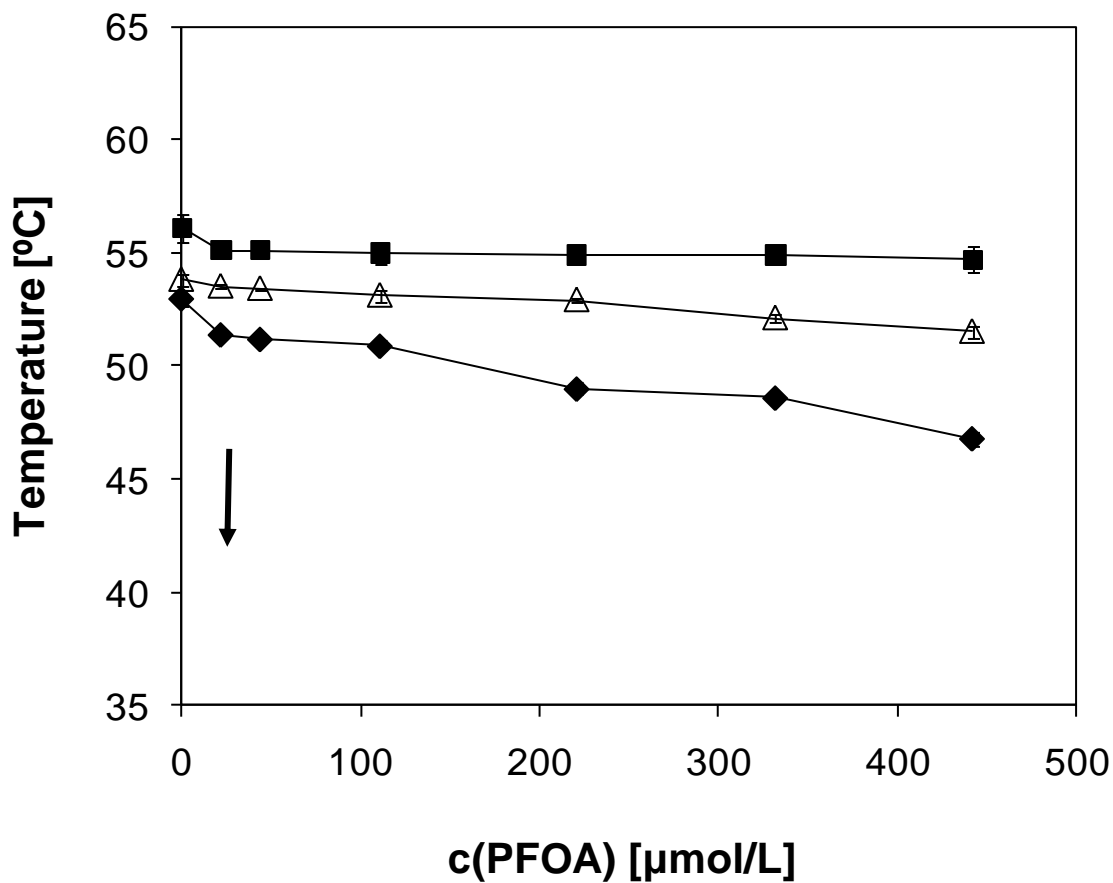

**Figure S2.** Partial phase diagrams of the DSPC-PFOA mixture obtained using TMA-DPH as fluorescence probe. As indicated by the arrow, all samples were cooled at a rate of  $0.2^\circ/\text{minute}$ . The data points represent averages of at least three experiments  $\pm$  one standard deviation. ■ = onset of main phase transition; ▲ = maximum of the main phase transition; ● = offset of the main phase transition.
